# Supplementary material for: Assessment of Heavy Metal Contamination and Ecological Risks in Sediments of the Buriganga River, Dhaka, Bangladesh
Source: Research Square preprint supplement (doi:10.21203/rs.3.rs-7493657/v1), 2025-11-13
Supplement: Supplementary file 1 [file 5878f8c61636b4e3b578ac70.docx]

**Assessment of Heavy Metal Contamination and Ecological Risks in Sediments of the Buriganga River, Dhaka, Bangladesh**

Md. Emon Perveza, Md. Sabbir Ahmmeda, Md. Sohel Ranaa, Sabbir Ahmeda, Farhana Khanam Ferdousia, Shizhen Zhaob, Md. Abu Bakar Siddiquec, Ahsan Habiba*

aDepartment of Chemistry, University of Dhaka, Dhaka 1000, Bangladesh

bState Key Laboratory of Advanced Environmental Technology, Guangzhou Institute of Geochemistry, Chinese Academy of Sciences, Guangzhou, 510640, China

cInstitute of National Analytical Research and Service (INARS), Bangladesh Council of Scientific and Industrial Research (BCSIR), Dhanmondi, Dhaka 1205, Bangladesh

*Corresponding author: habibchem@du.ac.bd (A. Habib)

| **LOD: 0.248 mg/kg**  **LOQ: 0.496 mg/kg** | (**b**)  **LOD: 1.76 μg/kg**  **LOQ: 3.51 μg/kg** |
| --- | --- |
| (**c**)  **LOD: 0.162 mg/kg**  **LOQ: 0.325 mg/kg** | (**d**)  **LOD: 0.300 μg/kg**  **LOQ: 0.600 μg/kg** |
| (**e**)  **LOQ: 0.102 mg/kg**  **LOD: 0.051 mg/kg** | (**f**)  **LOQ: 1.087 mg/kg**  **LOD: 0.543 mg/kg** |
|  |  |

Supplementary Fig. 1. Analytical calibration curves of (a) Pb, (b) Cd, (c) Cr, (d) Co, (e) Cu, and (f) Ni.

Supplementary Fig. S2. Total concentrations of heavy metals in sediments of the Buriganga river at different sampling sites (a) bar diagram and (b) pie diagram.
